# Supplementary material for: Cytotoxic-Ag-Modified Eggshell Membrane Nanocomposites as Bactericides in Concrete Mortar
Source: MDPI journal article supplement (doi:10.3390/ijms242015463), 2023-10-23
Supplement: s1 [file s1]

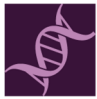

Article

# Cytotoxic-Ag-Modified Eggshell Membrane Nanocomposites as Bactericides in Concrete Mortar

Samuel Tomi Aina <sup>1</sup>, Hilda Dinah Kyomuhimbo <sup>1</sup>, Barend Du Plessis <sup>1</sup>, Vuyo Mjimba <sup>2</sup>, Nils Haneklaus <sup>3</sup>  
and Hendrik Gideon Brink <sup>1,\*</sup>

<sup>1</sup> Department of Chemical Engineering, University of Pretoria, South Africa; samuel.aina@tuks.co.za (S.T.A.); u21830658@tuks.co.za (H.D.K.); barend.duplessis@up.ac.za (B.D.P.)

<sup>2</sup> Human Sciences Research Council, Pretoria, South Africa; vmjimba@hsrc.ac.za

<sup>3</sup> Td Lab Sustainable Mineral Resources, University for Continuing Education Krems, Dr.-Karl-Dorrek-Straße 30, 3500 Krems, Austria; nils.haneklaus@donau-uni.ac.at

\* Correspondence: deon.brink@up.ac.za

## Supplementary Material

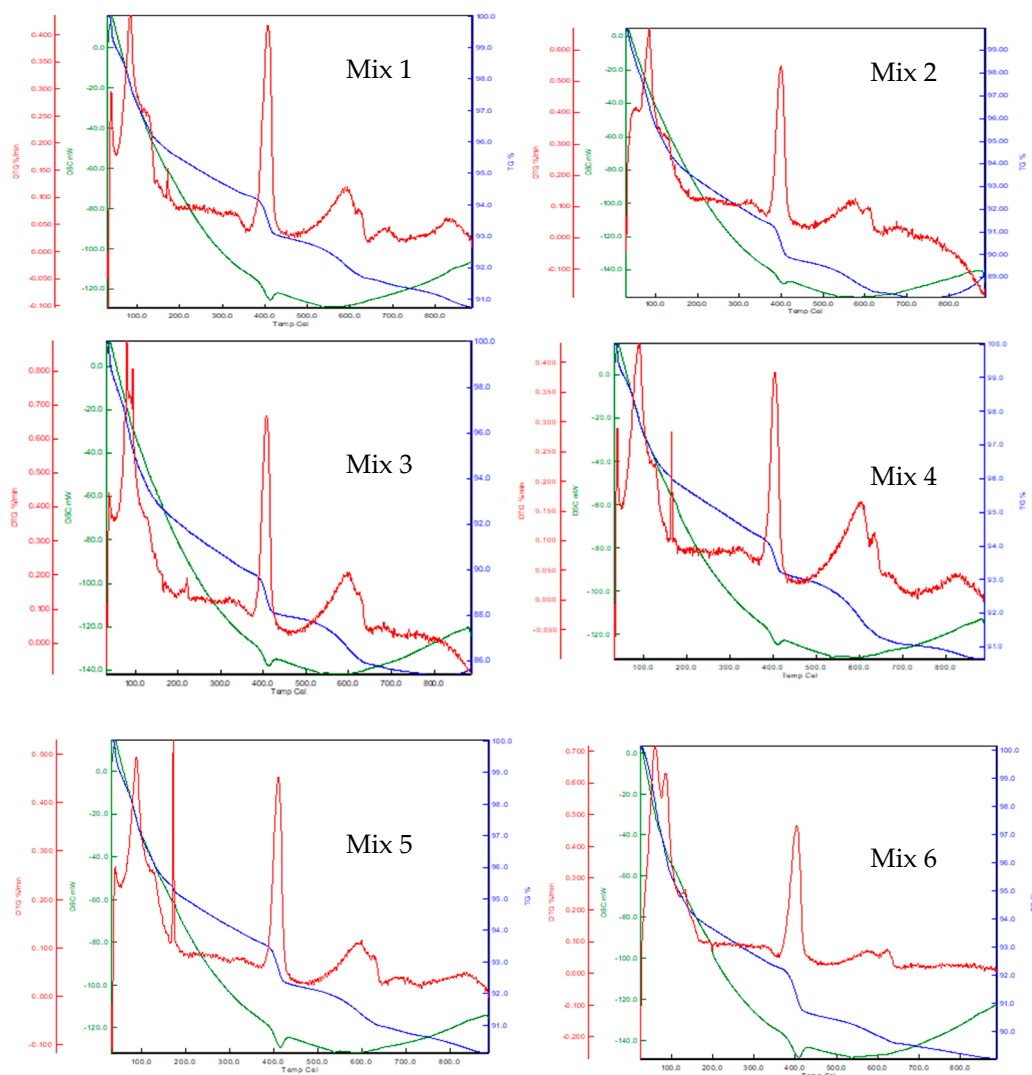

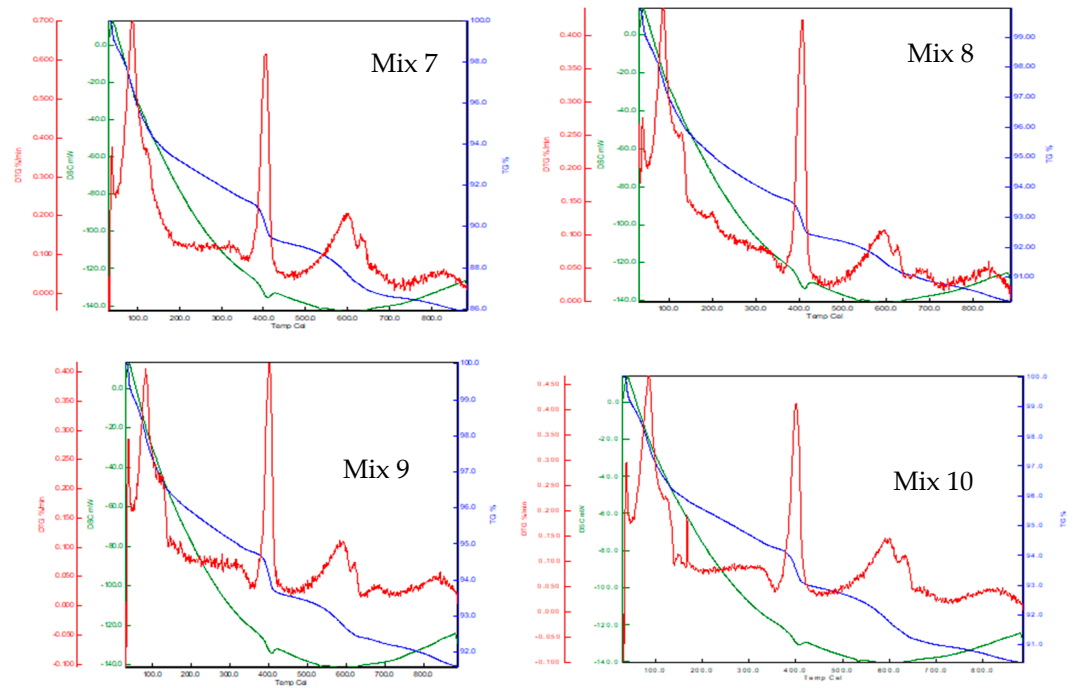

Figure S1. TG, DTG, and DSC analysis of concrete mixes. A to J for mix 1 to 10 respectively.

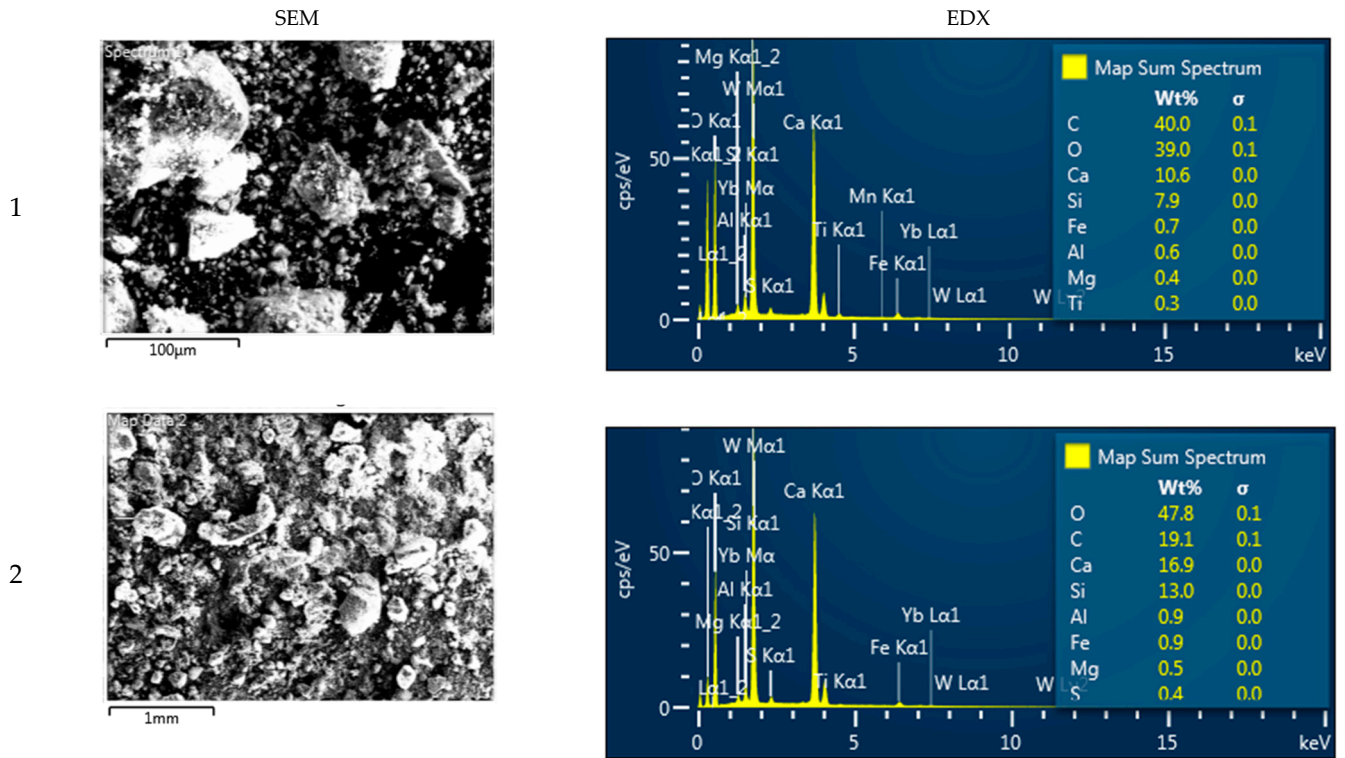

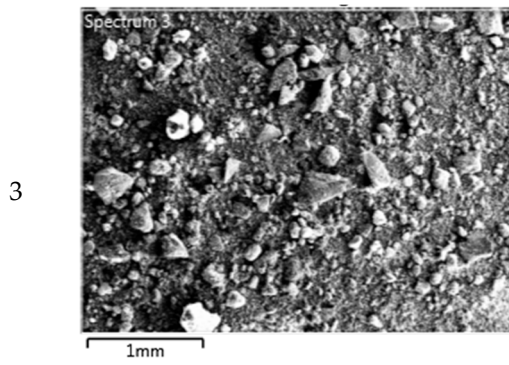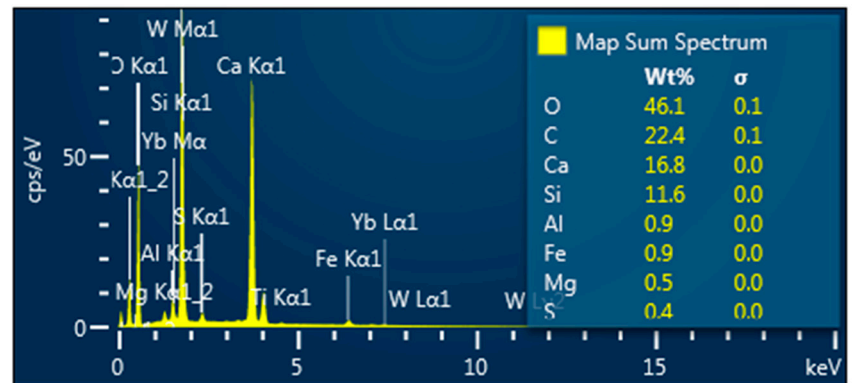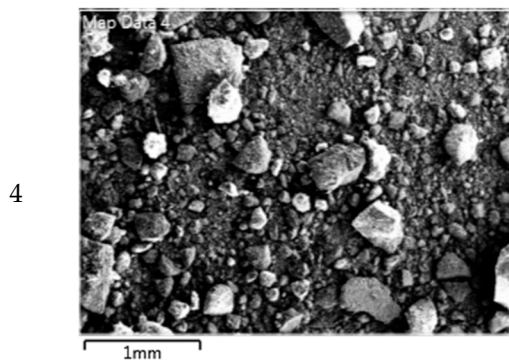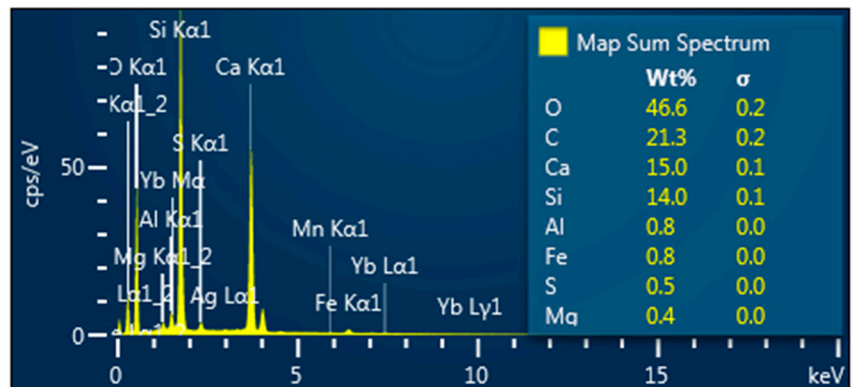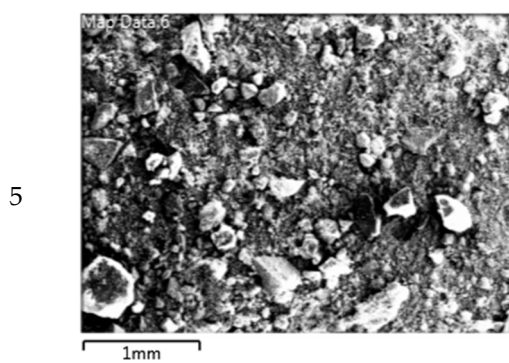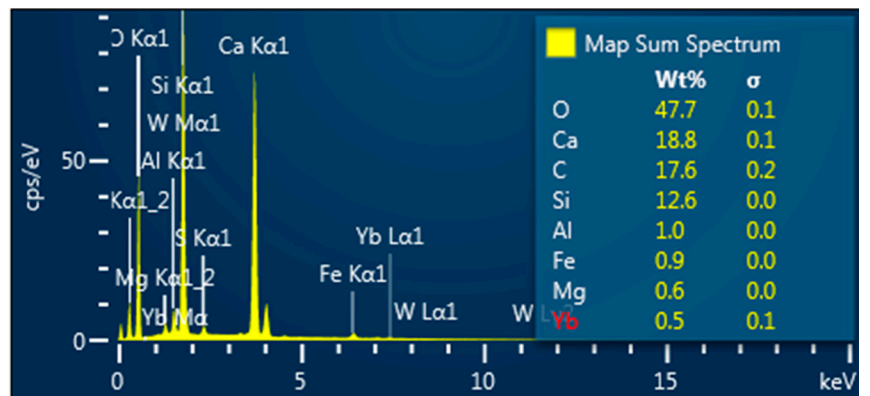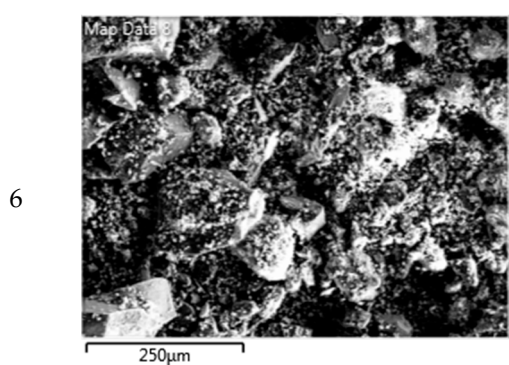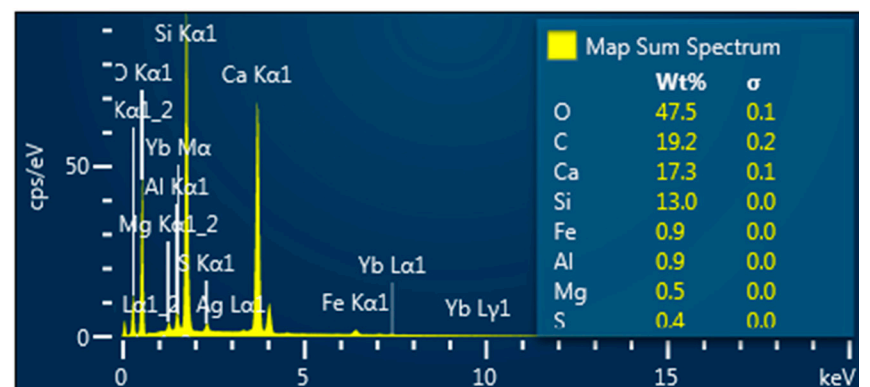





|        |       |       |             |            |       |             |            |       |       |       |
|--------|-------|-------|-------------|------------|-------|-------------|------------|-------|-------|-------|
| Mg     | 0.36  | 0.51  | 0.51        | 0.43       | 0.56  | 0.47        | 0.46       | 0.52  | 0.77  | 0.71  |
| Al     | 0.62  | 0.94  | 0.91        | 0.82       | 0.99  | 0.85        | 0.88       | 0.99  | 1.45  | 1.35  |
| Si     | 7.91  | 12.99 | 11.55       | 14         | 12.59 | 12.98       | 9.96       | 12.25 | 13.36 | 12.16 |
| S      | 0.25  | 0.4   | 0.42        | 0.45       | 0.43  | 0.42        | 0.48       | 0.46  | 0.69  | 0.76  |
| Ca     | 10.62 | 16.86 | 16.75       | 14.96      | 18.76 | 17.33       | 16.65      | 18.76 | 18.76 | 18.33 |
| Ti     | 0.29  | 0.13  | 0.15        | 0          | 0     | 0           | 0          | 0     | 0     | 0.26  |
| Mn     | 0.04  | 0     | 0           | 0.05       | 0     | 0           | 0          | 0     | 0.07  | 0.09  |
| Fe     | 0.73  | 0.92  | 0.87        | 0.8        | 0.94  | 0.92        | 0.86       | 0.97  | 1.44  | 1.44  |
| Yb     | 0.2   | 0.34  | 0.35        | 0.36       | 0.47  | 0.37        | 0.42       | 0.33  | 0.6   | 0.82  |
| W      | 0     | 0     | 0           | 0          | 0     | 0           | 0          | 0     | 0     | 0     |
| Ag     | 0     | 0     | <b>0.06</b> | <b>0.2</b> | 0     | <b>0.05</b> | <b>0.3</b> | 0     | 0     | 0     |
| Total: | 100   | 100   | 100         | 100        | 100   | 100         | 100        | 100   | 100   | 100   |

**Disclaimer/Publisher's Note:** The statements, opinions and data contained in all publications are solely those of the individual author(s) and contributor(s) and not of MDPI and/or the editor(s). MDPI and/or the editor(s) disclaim responsibility for any injury to people or property resulting from any ideas, methods, instructions or products referred to in the content.
